# Supplementary material for: Risk adjustment for inter-hospital comparison of primary cesarean section rates: need, validity and parsimony
Source: PubMed Central journal article supplement (PMC1590020; doi:10.1186/1472-6963-6-100), 2006-08-15
Supplement: 1472-6963-6-100-S1.pdf [file 1472-6963-6-100-S1.pdf]

## Additional files

### A) ICD 9-CM codes identifying clinical variables from mothers' discharge records

| Description                                                              | ICD 9-CM code                                                                                                                                         |
|--------------------------------------------------------------------------|-------------------------------------------------------------------------------------------------------------------------------------------------------|
| Diabetes                                                                 | 250 or 648.0, 648.8                                                                                                                                   |
| Hypertension                                                             | 40, 642.0y-642.3y (excluding when y equal to 2 or 4)                                                                                                  |
| Lung disease                                                             | 01, 48-51, 647.30, 647.31, 647.33, 668.01, 668.03                                                                                                     |
| HIV                                                                      | 042 or V08                                                                                                                                            |
| Other severe co-morbid illness of the mother                             | 140-200, 282.4, 282.6, 286, 287, 340-342, 344, 358-359, 39, 410-430, 441, 442, 446, 580, 646.21, 646.23, 648.5, 648.6, 659.3, 669.11, 669.13, 745-747 |
| Eclampsia or pre-eclampsia                                               | 642.4y-642.7y (excluding when y equal to 2 or 4)                                                                                                      |
| Ante-partum haemorrhage/abruptio placentae/placenta previa               | 641                                                                                                                                                   |
| Polyhydramnios                                                           | 657                                                                                                                                                   |
| Oligohydramnios                                                          | 658.0                                                                                                                                                 |
| Premature rupture of membranes                                           | 658.1                                                                                                                                                 |
| Other problems of the amnios                                             | 658.4, 658.8, 658.9                                                                                                                                   |
| Cord prolapse                                                            | 663.0                                                                                                                                                 |
| Abortion threads/assisted fecundation/supervision of high risk pregnancy | 630, 640, 644.0, 644.1 646.3, V26, V23                                                                                                                |
| Pre-term delivery                                                        | 644.2                                                                                                                                                 |
| Post-term delivery                                                       | 645                                                                                                                                                   |
| Malposition and malpresentation of fetus                                 | 652                                                                                                                                                   |
| Fetopelvic disproportion/excessive development of the infant             | 653, 656.6                                                                                                                                            |
| Fetal abnormality                                                        | 655                                                                                                                                                   |
| RH-Isoimmunization                                                       | 656.1                                                                                                                                                 |

### B) ICD 9-CM codes identifying variables from neonatal discharge records

| Description                  | ICD 9-CM code |
|------------------------------|---------------|
| Congenital malformation      | 74, 75        |
| Post-maturity and macrosomia | 766           |

### C) ICD 9-CM codes identifying variables from both neo and maternal discharge rec.

| Description                     | ICD 9-CM code                                         |
|---------------------------------|-------------------------------------------------------|
| Intrauterine growth retardation | 764, 656.5                                            |
| Multiple pregnancy              | one of the following codes: 651, V27.2 –V27.9 V31-V37 |
